# Supplementary material for: Predictive value of inflammation-based Glasgow prognostic score, platelet-lymphocyte ratio, and global registry of acute coronary events score for major cardiovascular and cerebrovascular events during hospitalization in patients with acute myocardial infarction
Source: publisher site journal article supplement (doi:10.18632/aging.203273), 2021-07-16
Supplement: Supplementary file [file aging-v13i14-203273-supplementary-material-SD1.pdf]

## **Supplementary Materials**

Predictive value of inflammation-based Glasgow Prognostic Score, platelet-lymphocyte ratio, and Global Registry of Acute Coronary Events score for major cardiovascular and cerebrovascular events during hospitalization in patients with acute myocardial infarction.

|                                                                                                                                                        |    |
|--------------------------------------------------------------------------------------------------------------------------------------------------------|----|
| Supplementary Figure 1. Design of the present study.....                                                                                               | 3  |
| Supplementary Table 1. Statistics of missing value and extremes.....                                                                                   | 4  |
| Supplementary Table 2. Pairwise comparison of univariate receiver operating characteristic curves.....                                                 | 6  |
| Supplementary Table 3. Pairwise comparison of multivariate receiver operating characteristic curves.....                                               | 8  |
| Supplementary Table 4. Comparisons between multivariate receiver operating characteristic (ROC) curves with high scores and univariate ROC curves..... | 10 |
| Supplementary Figure 2. Subgroup results based on type of myocardial infarction (MI) in patients.....                                                  | 12 |
| Supplementary Table 5. Subgroup results based on type of myocardial infarction (MI) in patients.....                                                   | 14 |
| Supplementary Figure 3. Subgroup results based on whether the patients undergoing percutaneous coronary intervention (PCI) or not.....                 | 22 |
| Supplementary Table 6. Subgroup results based on whether the patients undergoing percutaneous coronary intervention (PCI) or not.....                  | 24 |
| Supplementary Figure 4. Subgroup results based on whether the patients had an acute infection or not.....                                              | 31 |
| Supplementary Table 7. Subgroup results based on whether the patients had an acute infection or not.....                                               | 33 |
| Supplementary Figure 5. Receiver operating characteristic of three PLRSs.....                                                                          | 41 |
| Supplementary Table 8. Receiver operating characteristic of three PLRSs.....                                                                           | 42 |

## Supplementary Figure 1. Design of the present study.

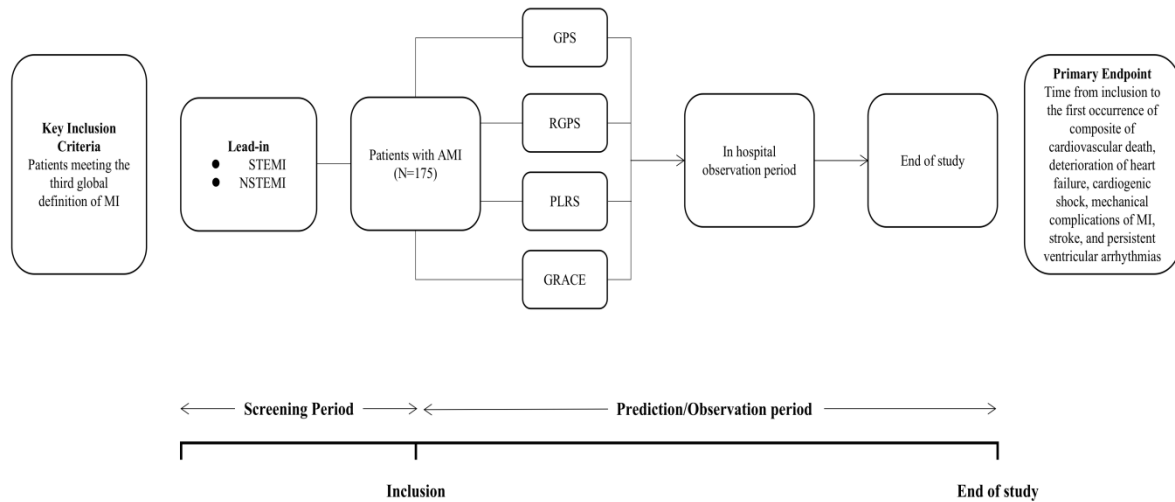

AMI = Acute MI; MI = myocardial infarction; NSTEMI = non-ST-elevation myocardial infarction; GPS = inflammation-based Glasgow Prognostic Score; GRACE = Global Registry of Acute Coronary Events; PLRS = platelet-to-lymphocyte ratio score; RGPS = redefined GPS; STEMI = ST-elevation myocardial infarction.

**Supplementary Table 1. Statistics of missing value and extremesa.**

|                 | N   | Mean    | Std.<br>Deviation | Missing |         | No. of Extremesa |      |
|-----------------|-----|---------|-------------------|---------|---------|------------------|------|
|                 |     |         |                   | Count   | Percent | Low              | High |
| Age             | 175 | 65.72   | 15.900            | 0       | 0.0     | 0                | 0    |
| Lymphocyte      | 175 | 1.3535  | 0.59552           | 0       | 0.0     | 0                | 4    |
| Hemoglobin      | 175 | 125.75  | 19.965            | 0       | 0.0     | 2                | 0    |
| Platelet        | 175 | 198.79  | 72.370            | 0       | 0.0     | 1                | 10   |
| ALT             | 175 | 44.22   | 45.215            | 0       | 0.0     | 0                | 10   |
| CK              | 175 | 1060.17 | 1415.633          | 0       | 0.0     | 0                | 19   |
| CK-MB           | 175 | 90.27   | 123.282           | 0       | 0.0     | 0                | 16   |
| Albumin         | 175 | 36.249  | 4.5713            | 0       | 0.0     | 4                | 1    |
| LDL             | 172 | 2.3278  | 0.87149           | 3       | 1.7     | 0                | 6    |
| Creatinine      | 175 | 105.665 | 83.6032           | 0       | 0.0     | 0                | 12   |
| HS-CRP          | 175 | 25.9226 | 38.82788          | 0       | 0.0     | 0                | 26   |
| BNP             | 169 | 571.48  | 762.106           | 6       | 3.4     | 0                | 8    |
| TNI             | 175 | 66.5725 | 171.14042         | 0       | 0.0     | 0                | 24   |
| Heart rate      | 175 | 81.64   | 16.708            | 0       | 0.0     | 0                | 2    |
| SBP             | 175 | 131.83  | 22.842            | 0       | 0.0     | 1                | 1    |
| DBP             | 175 | 74.81   | 13.883            | 0       | 0.0     | 0                | 3    |
| D-Dimer         | 172 | 1.37998 | 2.935950          | 3       | 1.7     | 0                | 17   |
| Males           | 175 |         |                   | 0       | 0.0     |                  |      |
| ST segment down | 175 |         |                   | 0       | 0.0     |                  |      |
| MACE            | 175 |         |                   | 0       | 0.0     |                  |      |
| Hypertension    | 175 |         |                   | 0       | 0.0     |                  |      |
| Diabetics       | 175 |         |                   | 0       | 0.0     |                  |      |

|                              |     |  |   |     |
|------------------------------|-----|--|---|-----|
| Killip class                 | 175 |  | 0 | 0.0 |
| PCI type                     | 175 |  | 0 | 0.0 |
| Acute infections             | 175 |  | 0 | 0.0 |
| Autoimmune diseases          | 175 |  | 0 | 0.0 |
| Nephrotic syndrome or uremia | 175 |  | 0 | 0.0 |
| Liver cirrhosis              | 175 |  | 0 | 0.0 |

a Number of cases outside the range (Q1 - 1.5\*IQR, Q3 + 1.5\*IQR).

**Supplementary Table 2. Pairwise comparison of univariate receiver operating characteristic curves.**

| GPS ~ RGPS                  |                    |
|-----------------------------|--------------------|
| Difference between areas    | 0.0144             |
| Standard Error <sup>a</sup> | 0.0111             |
| 95% Confidence Interval     | -0.00738 to 0.0361 |
| z statistic                 | 1.294              |
| Significance level          | P = 0.1956         |
| GPS ~ GRACE                 |                    |
| Difference between areas    | 0.0133             |
| Standard Error <sup>a</sup> | 0.0427             |
| 95% Confidence Interval     | -0.0704 to 0.0971  |
| z statistic                 | 0.312              |
| Significance level          | P = 0.7550         |
| GPS ~ PLRS                  |                    |
| Difference between areas    | 0.219              |
| Standard Error <sup>a</sup> | 0.0543             |
| 95% Confidence Interval     | 0.112 to 0.325     |
| z statistic                 | 4.026              |
| Significance level          | P = 0.0001         |
| RGPS ~ GRACE                |                    |
| Difference between areas    | 0.0277             |
| Standard Error <sup>a</sup> | 0.0420             |
| 95% Confidence Interval     | -0.0547 to 0.110   |
| z statistic                 | 0.659              |
| Significance level          | P = 0.5099         |
| RGPS ~ PLRS                 |                    |
| Difference between areas    | 0.204              |
| Standard Error <sup>a</sup> | 0.0538             |
| 95% Confidence Interval     | 0.0991 to 0.310    |
| z statistic                 | 3.803              |
| Significance level          | P = 0.0001         |
| GRACE ~ PLRS                |                    |

|                             |                |
|-----------------------------|----------------|
| Difference between areas    | 0.232          |
| Standard Error <sup>a</sup> | 0.0551         |
| 95% Confidence Interval     | 0.124 to 0.340 |
| z statistic                 | 4.213          |
| Significance level          | P < 0.0001     |

**Supplementary Table 3. Pairwise comparison of multivariate receiver operating characteristic curves.**

| GPS_GRACE ~ GPS_PLRS        |                   |
|-----------------------------|-------------------|
| Difference between areas    | 0.0266            |
| Standard Error <sup>a</sup> | 0.0243            |
| 95% Confidence Interval     | -0.0210 to 0.0742 |
| z statistic                 | 1.094             |
| Significance level          | P = 0.2739        |
| GPS_GRACE ~ GRACE_PLRS      |                   |
| Difference between areas    | 0.0157            |
| Standard Error <sup>a</sup> | 0.0330            |
| 95% Confidence Interval     | -0.0489 to 0.0804 |
| z statistic                 | 0.477             |
| Significance level          | P = 0.6333        |
| GPS_GRACE ~ GPS_GRACE_PLRS  |                   |
| Difference between areas    | 0.0317            |
| Standard Error <sup>a</sup> | 0.0139            |
| 95% Confidence Interval     | 0.00445 to 0.0589 |
| z statistic                 | 2.281             |
| Significance level          | P = 0.0226        |
| GPS_PLRS ~ GRACE_PLRS       |                   |
| Difference between areas    | 0.0108            |
| Standard Error <sup>a</sup> | 0.0481            |
| 95% Confidence Interval     | -0.0835 to 0.105  |
| z statistic                 | 0.225             |
| Significance level          | P = 0.8219        |
| GPS_PLRS ~ GPS_GRACE_PLRS   |                   |
| Difference between areas    | 0.0582            |
| Standard Error <sup>a</sup> | 0.0311            |
| 95% Confidence Interval     | -0.00278 to 0.119 |
| z statistic                 | 1.871             |
| Significance level          | P = 0.0614        |
| GRACE_PLRS ~ GPS_GRACE_PLRS |                   |



|                             |                   |
|-----------------------------|-------------------|
| Difference between areas    | 0.0474            |
| Standard Error <sup>a</sup> | 0.0232            |
| 95% Confidence Interval     | 0.00199 to 0.0928 |
| z statistic                 | 2.046             |
| Significance level          | P = 0.0408        |

**Supplementary Table 4. Comparisons between multivariate receiver operating characteristic (ROC) curves with high scores and univariate ROC curves.**

| GPS_GRACE_PLRS ~ GPS        |                    |
|-----------------------------|--------------------|
| Difference between areas    | 0.0611             |
| Standard Error <sup>a</sup> | 0.0249             |
| 95% Confidence Interval     | 0.0123 to 0.110    |
| z statistic                 | 2.456              |
| Significance level          | P = 0.0140         |
| GPS_GRACE_PLRS ~ RGPS       |                    |
| Difference between areas    | 0.0755             |
| Standard Error <sup>a</sup> | 0.0260             |
| 95% Confidence Interval     | 0.0246 to 0.126    |
| z statistic                 | 2.908              |
| Significance level          | P = 0.0036         |
| GPS_GRACE_PLRS ~ GRACE      |                    |
| Difference between areas    | 0.0478             |
| Standard Error <sup>a</sup> | 0.0230             |
| 95% Confidence Interval     | 0.00271 to 0.0928  |
| z statistic                 | 2.078              |
| Significance level          | P = 0.0377         |
| GPS_GRACE ~ GPS             |                    |
| Difference between areas    | 0.0294             |
| Standard Error <sup>a</sup> | 0.0158             |
| 95% Confidence Interval     | -0.00161 to 0.0605 |
| z statistic                 | 1.858              |
| Significance level          | P = 0.0631         |
| GPS_GRACE ~ RGPS            |                    |
| Difference between areas    | 0.0438             |
| Standard Error <sup>a</sup> | 0.0183             |
| 95% Confidence Interval     | 0.00800 to 0.0796  |
| z statistic                 | 2.398              |
| Significance level          | P = 0.0165         |
| GPS_GRACE ~ GRACE           |                    |

|                             |                   |
|-----------------------------|-------------------|
| Difference between areas    | 0.0161            |
| Standard Error <sup>a</sup> | 0.0328            |
| 95% Confidence Interval     | -0.0481 to 0.0803 |
| z statistic                 | 0.492             |
| Significance level          | P = 0.6230        |

**Supplementary Figure 2. Subgroup results based on type of myocardial infarction (MI) in patients.**

(1) Univariate receiver operating characteristic (ROC) curve analysis in STEMI group.

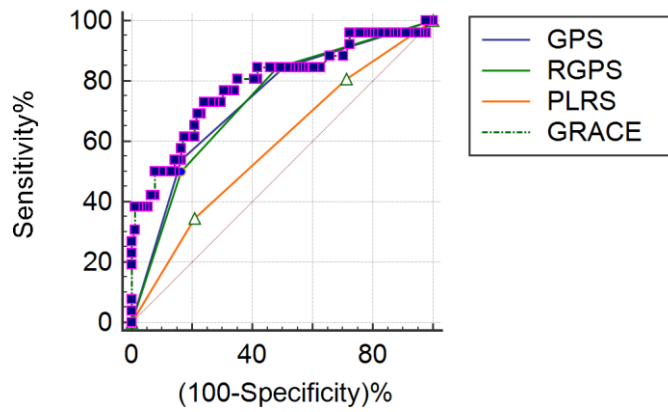

(2) Multivariate ROC curve analysis in STEMI group.

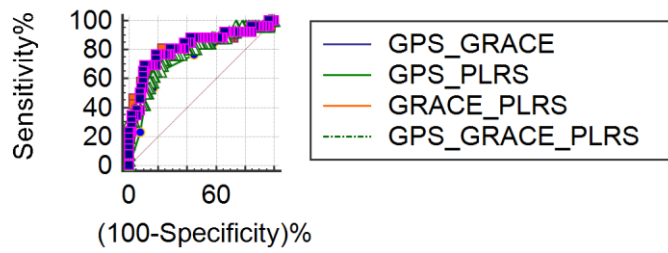

(3) Univariate ROC curve analysis in NSTEMI group.

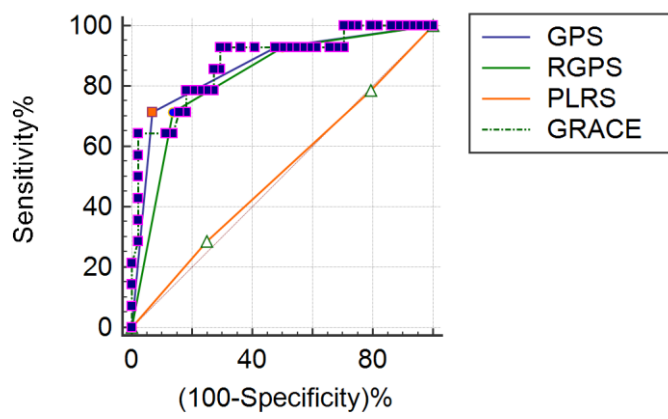

(4) Multivariate ROC curve analysis in NSTEMI group.

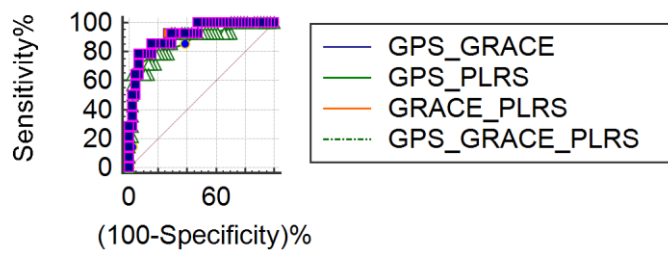

**Supplementary Table 5. Subgroup results based on type of myocardial infarction (MI) in patients.**

(1) Pairwise comparison of univariate receiver operating characteristic (ROC) curves in STEMI group.

| Variable | AUC   | SE <sup>a</sup> | 95% CI <sup>b</sup> |
|----------|-------|-----------------|---------------------|
| GPS      | 0.737 | 0.0533          | 0.647 to 0.814      |
| RGPS     | 0.732 | 0.0525          | 0.643 to 0.810      |
| PLRS     | 0.586 | 0.0600          | 0.491 to 0.676      |
| GRACE    | 0.788 | 0.0568          | 0.703 to 0.858      |

| GPS ~ RGPS                  |                   |
|-----------------------------|-------------------|
| Difference between areas    | 0.00423           |
| Standard Error <sup>a</sup> | 0.0144            |
| 95% Confidence Interval     | -0.0239 to 0.0324 |
| z statistic                 | 0.294             |
| Significance level          | P = 0.7686        |
| GPS ~ PLRS                  |                   |
| Difference between areas    | 0.151             |
| Standard Error <sup>a</sup> | 0.0635            |
| 95% Confidence Interval     | 0.0262 to 0.275   |
| z statistic                 | 2.373             |
| Significance level          | P = 0.0177        |
| GPS ~ GRACE                 |                   |
| Difference between areas    | 0.0516            |
| Standard Error <sup>a</sup> | 0.0488            |
| 95% Confidence Interval     | -0.0441 to 0.147  |
| z statistic                 | 1.057             |
| Significance level          | P = 0.2907        |
| RGPS ~ PLRS                 |                   |
| Difference between areas    | 0.146             |
| Standard Error <sup>a</sup> | 0.0628            |
| 95% Confidence Interval     | 0.0234 to 0.269   |
| z statistic                 | 2.334             |

|                             |                  |
|-----------------------------|------------------|
| Significance level          | P = 0.0196       |
| <b>RGPS ~ GRACE</b>         |                  |
| Difference between areas    | 0.0558           |
| Standard Error <sup>a</sup> | 0.0484           |
| 95% Confidence Interval     | -0.0391 to 0.151 |
| z statistic                 | 1.153            |
| Significance level          | P = 0.2490       |
| <b>PLRS ~ GRACE</b>         |                  |
| Difference between areas    | 0.202            |
| Standard Error <sup>a</sup> | 0.0640           |
| 95% Confidence Interval     | 0.0767 to 0.328  |
| z statistic                 | 3.158            |
| Significance level          | P = 0.0016       |

(2) Pairwise comparison of multivariate ROC curves in STEMI group.

| Variable       | AUC   | SE <sup>a</sup> | 95% CI <sup>b</sup> |
|----------------|-------|-----------------|---------------------|
| GPS_GRACE      | 0.807 | 0.0569          | 0.724 to 0.874      |
| GPS_PLRS       | 0.738 | 0.0586          | 0.649 to 0.815      |
| GRACE_PLRS     | 0.791 | 0.0556          | 0.706 to 0.860      |
| GPS_GRACE_PLRS | 0.816 | 0.0550          | 0.734 to 0.882      |

|                               |                   |
|-------------------------------|-------------------|
| <b>GPS_GRACE ~ GPS_PLRS</b>   |                   |
| Difference between areas      | 0.0693            |
| Standard Error <sup>a</sup>   | 0.0362            |
| 95% Confidence Interval       | -0.00165 to 0.140 |
| z statistic                   | 1.914             |
| Significance level            | P = 0.0556        |
| <b>GPS_GRACE ~ GRACE_PLRS</b> |                   |
| Difference between areas      | 0.0167            |
| Standard Error <sup>a</sup>   | 0.0206            |
| 95% Confidence Interval       | -0.0238 to 0.0572 |
| z statistic                   | 0.808             |
| Significance level            | P = 0.4188        |

| GPS_GRACE ~ GPS_GRACE_PLRS  |                     |
|-----------------------------|---------------------|
| Difference between areas    | 0.00866             |
| Standard Error <sup>a</sup> | 0.00870             |
| 95% Confidence Interval     | -0.00838 to 0.0257  |
| z statistic                 | 0.996               |
| Significance level          | P = 0.3191          |
| GPS_PLRS ~ GRACE_PLRS       |                     |
| Difference between areas    | 0.0526              |
| Standard Error <sup>a</sup> | 0.0520              |
| 95% Confidence Interval     | -0.0494 to 0.155    |
| z statistic                 | 1.011               |
| Significance level          | P = 0.3119          |
| GPS_PLRS ~ GPS_GRACE_PLRS   |                     |
| Difference between areas    | 0.0780              |
| Standard Error <sup>a</sup> | 0.0398              |
| 95% Confidence Interval     | -0.0000320 to 0.156 |
| z statistic                 | 1.959               |
| Significance level          | P = 0.0501          |
| GRACE_PLRS ~ GPS_GRACE_PLRS |                     |
| Difference between areas    | 0.0254              |
| Standard Error <sup>a</sup> | 0.0202              |
| 95% Confidence Interval     | -0.0143 to 0.0650   |
| z statistic                 | 1.254               |
| Significance level          | P = 0.2097          |

(3) Comparisons between multivariate ROC curves with high scores and univariate ROC curves in STEMI group.

| Variable       | AUC   | SE <sup>a</sup> | 95% CI <sup>b</sup> |
|----------------|-------|-----------------|---------------------|
| GPS_GRACE_PLRS | 0.816 | 0.0550          | 0.734 to 0.882      |
| GPS            | 0.737 | 0.0533          | 0.647 to 0.814      |
| RGPS           | 0.732 | 0.0525          | 0.643 to 0.810      |
| GRACE          | 0.788 | 0.0568          | 0.703 to 0.858      |

GPS\_GRACE\_PLRS ~ GPS



|                               |                   |
|-------------------------------|-------------------|
| Difference between areas      | 0.0792            |
| Standard Error <sup>a</sup>   | 0.0359            |
| 95% Confidence Interval       | 0.00883 to 0.150  |
| z statistic                   | 2.206             |
| Significance level            | P = 0.0274        |
| <b>GPS_GRACE_PLRS ~ RGPS</b>  |                   |
| Difference between areas      | 0.0835            |
| Standard Error <sup>a</sup>   | 0.0368            |
| 95% Confidence Interval       | 0.0114 to 0.156   |
| z statistic                   | 2.271             |
| Significance level            | P = 0.0231        |
| <b>GPS_GRACE_PLRS ~ GRACE</b> |                   |
| Difference between areas      | 0.0277            |
| Standard Error <sup>a</sup>   | 0.0195            |
| 95% Confidence Interval       | -0.0106 to 0.0660 |
| z statistic                   | 1.418             |
| Significance level            | P = 0.1562        |

(4) Pairwise comparison of univariate receiver ROC curves in NSTEMI group.

| Variable | AUC   | SE <sup>a</sup> | 95% CI <sup>b</sup> |
|----------|-------|-----------------|---------------------|
| GPS      | 0.864 | 0.0585          | 0.749 to 0.940      |
| RGPS     | 0.830 | 0.0608          | 0.708 to 0.916      |
| PLRS     | 0.511 | 0.0848          | 0.376 to 0.644      |
| GRACE    | 0.877 | 0.0574          | 0.764 to 0.948      |

|                             |                    |
|-----------------------------|--------------------|
| <b>GPS ~ RGPS</b>           |                    |
| Difference between areas    | 0.0349             |
| Standard Error <sup>a</sup> | 0.0187             |
| 95% Confidence Interval     | -0.00180 to 0.0716 |
| z statistic                 | 1.864              |
| Significance level          | P = 0.0624         |
| <b>GPS ~ PLRS</b>           |                    |
| Difference between areas    | 0.354              |

|                             |                  |
|-----------------------------|------------------|
| Standard Error <sup>a</sup> | 0.100            |
| 95% Confidence Interval     | 0.158 to 0.550   |
| z statistic                 | 3.533            |
| Significance level          | P = 0.0004       |
| <b>GPS ~ GRACE</b>          |                  |
| Difference between areas    | 0.0122           |
| Standard Error <sup>a</sup> | 0.0728           |
| 95% Confidence Interval     | -0.131 to 0.155  |
| z statistic                 | 0.167            |
| Significance level          | P = 0.8672       |
| <b>RGPS ~ PLRS</b>          |                  |
| Difference between areas    | 0.319            |
| Standard Error <sup>a</sup> | 0.0995           |
| 95% Confidence Interval     | 0.124 to 0.514   |
| z statistic                 | 3.205            |
| Significance level          | P = 0.0014       |
| <b>RGPS ~ GRACE</b>         |                  |
| Difference between areas    | 0.0471           |
| Standard Error <sup>a</sup> | 0.0735           |
| 95% Confidence Interval     | -0.0970 to 0.191 |
| z statistic                 | 0.640            |
| Significance level          | P = 0.5219       |
| <b>PLRS ~ GRACE</b>         |                  |
| Difference between areas    | 0.366            |
| Standard Error <sup>a</sup> | 0.0965           |
| 95% Confidence Interval     | 0.177 to 0.555   |
| z statistic                 | 3.792            |
| Significance level          | P = 0.0001       |

(5) Pairwise comparison of multivariate ROC curves in NSTEMI group.

| Variable   | AUC   | SE <sup>a</sup> | 95% CI <sup>b</sup> |
|------------|-------|-----------------|---------------------|
| GPS_GRACE  | 0.913 | 0.0424          | 0.809 to 0.971      |
| GPS_PLRS   | 0.869 | 0.0607          | 0.755 to 0.943      |
| GRACE_PLRS | 0.877 | 0.0574          | 0.764 to 0.948      |

|                |       |        |                |
|----------------|-------|--------|----------------|
| GPS_GRACE_PLRS | 0.912 | 0.0428 | 0.808 to 0.971 |
|----------------|-------|--------|----------------|

| GPS_GRACE ~ GPS_PLRS        |                     |
|-----------------------------|---------------------|
| Difference between areas    | 0.0438              |
| Standard Error <sup>a</sup> | 0.0509              |
| 95% Confidence Interval     | -0.0560 to 0.144    |
| z statistic                 | 0.861               |
| Significance level          | P = 0.3894          |
| GPS_GRACE ~ GRACE_PLRS      |                     |
| Difference between areas    | 0.0365              |
| Standard Error <sup>a</sup> | 0.0355              |
| 95% Confidence Interval     | -0.0330 to 0.106    |
| z statistic                 | 1.030               |
| Significance level          | P = 0.3028          |
| GPS_GRACE ~ GPS_GRACE_PLRS  |                     |
| Difference between areas    | 0.000812            |
| Standard Error <sup>a</sup> | 0.00262             |
| 95% Confidence Interval     | -0.00432 to 0.00594 |
| z statistic                 | 0.310               |
| Significance level          | P = 0.7565          |
| GPS_PLRS ~ GRACE_PLRS       |                     |
| Difference between areas    | 0.00731             |
| Standard Error <sup>a</sup> | 0.0792              |
| 95% Confidence Interval     | -0.148 to 0.162     |
| z statistic                 | 0.0923              |
| Significance level          | P = 0.9265          |
| GPS_PLRS ~ GPS_GRACE_PLRS   |                     |
| Difference between areas    | 0.0430              |
| Standard Error <sup>a</sup> | 0.0497              |
| 95% Confidence Interval     | -0.0544 to 0.140    |
| z statistic                 | 0.865               |
| Significance level          | P = 0.3869          |
| GRACE_PLRS ~ GPS_GRACE_PLRS |                     |
| Difference between areas    | 0.0357              |

|                             |                  |
|-----------------------------|------------------|
| Standard Error <sup>a</sup> | 0.0365           |
| 95% Confidence Interval     | -0.0359 to 0.107 |
| z statistic                 | 0.978            |
| Significance level          | P = 0.3283       |

(6) Comparisons between multivariate ROC curves with high scores and univariate ROC curves in NSTEMI group.

| Variable       | AUC   | SE <sup>a</sup> | 95% CI <sup>b</sup> |
|----------------|-------|-----------------|---------------------|
| GPS_GRACE_PLRS | 0.912 | 0.0428          | 0.808 to 0.971      |
| GPS_GRACE      | 0.913 | 0.0424          | 0.809 to 0.971      |
| GPS            | 0.864 | 0.0585          | 0.749 to 0.940      |
| RGPS           | 0.830 | 0.0608          | 0.708 to 0.916      |
| GRACE          | 0.877 | 0.0574          | 0.764 to 0.948      |

| GPS_GRACE_PLRS ~ GPS        |                   |
|-----------------------------|-------------------|
| Difference between areas    | 0.0479            |
| Standard Error <sup>a</sup> | 0.0400            |
| 95% Confidence Interval     | -0.0304 to 0.126  |
| z statistic                 | 1.198             |
| Significance level          | P = 0.2308        |
| GPS_GRACE_PLRS ~ RGPS       |                   |
| Difference between areas    | 0.0828            |
| Standard Error <sup>a</sup> | 0.0419            |
| 95% Confidence Interval     | 0.000611 to 0.165 |
| z statistic                 | 1.975             |
| Significance level          | P = 0.0483        |
| GPS_GRACE_PLRS ~ GRACE      |                   |
| Difference between areas    | 0.0357            |
| Standard Error <sup>a</sup> | 0.0367            |
| 95% Confidence Interval     | -0.0362 to 0.108  |
| z statistic                 | 0.973             |
| Significance level          | P = 0.3303        |

| GPS_GRACE ~ GPS             |                    |
|-----------------------------|--------------------|
| Difference between areas    | 0.0487             |
| Standard Error <sup>a</sup> | 0.0413             |
| 95% Confidence Interval     | -0.0323 to 0.130   |
| z statistic                 | 1.178              |
| Significance level          | P = 0.2386         |
| GPS_GRACE ~ RGPS            |                    |
| Difference between areas    | 0.0836             |
| Standard Error <sup>a</sup> | 0.0431             |
| 95% Confidence Interval     | -0.000968 to 0.168 |
| z statistic                 | 1.938              |
| Significance level          | P = 0.0527         |
| GPS_GRACE ~ GRACE           |                    |
| Difference between areas    | 0.0365             |
| Standard Error <sup>a</sup> | 0.0356             |
| 95% Confidence Interval     | -0.0333 to 0.106   |
| z statistic                 | 1.025              |
| Significance level          | P = 0.3055         |

**Supplementary Figure 3. Subgroup results based on whether the patients undergoing percutaneous coronary intervention (PCI) or not.**

(1) Univariate receiver operating characteristic (ROC) curve analysis in PCI group.

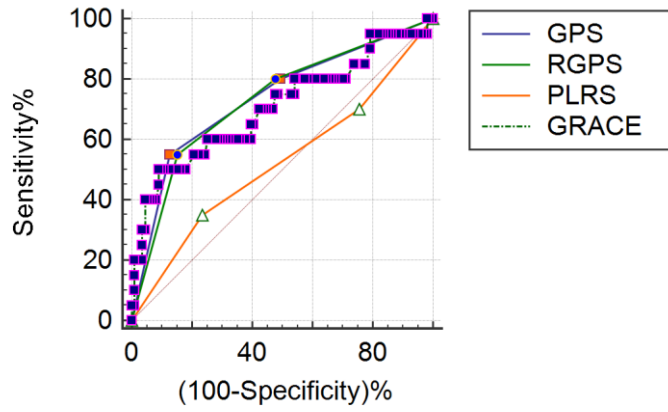

(2) Multivariate ROC curve analysis in PCI group.

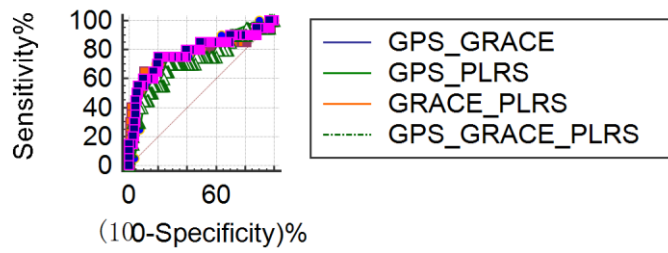

(3) Univariate ROC curve analysis in non-PCI group.

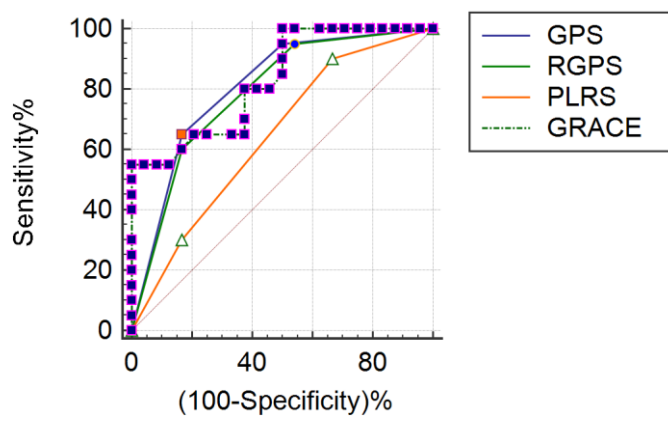

(4) Multivariate ROC curve analysis in non-PCI group.



**Supplementary Table 6. Subgroup results based on whether the patients undergoing percutaneous coronary intervention (PCI) or not.**

(1) Pairwise comparison of univariate receiver operating characteristic (ROC) curves in PCI group.

| Variable | AUC   | SE <sup>a</sup> | 95% CI <sup>b</sup> |
|----------|-------|-----------------|---------------------|
| GPS      | 0.738 | 0.0636          | 0.654 to 0.811      |
| RGPS     | 0.731 | 0.0621          | 0.647 to 0.805      |
| PLRS     | 0.522 | 0.0737          | 0.433 to 0.610      |
| GRACE    | 0.704 | 0.0741          | 0.618 to 0.781      |

| GPS ~ RGPS                  |                   |
|-----------------------------|-------------------|
| Difference between areas    | 0.00676           |
| Standard Error <sup>a</sup> | 0.0109            |
| 95% Confidence Interval     | -0.0146 to 0.0281 |
| z statistic                 | 0.620             |
| Significance level          | P = 0.5354        |
| GPS ~ PLRS                  |                   |
| Difference between areas    | 0.216             |
| Standard Error <sup>a</sup> | 0.0723            |
| 95% Confidence Interval     | 0.0742 to 0.358   |
| z statistic                 | 2.986             |
| Significance level          | P = 0.0028        |
| GPS ~ GRACE                 |                   |
| Difference between areas    | 0.0338            |
| Standard Error <sup>a</sup> | 0.0561            |
| 95% Confidence Interval     | -0.0762 to 0.144  |
| z statistic                 | 0.602             |
| Significance level          | P = 0.5472        |
| RGPS ~ PLRS                 |                   |
| Difference between areas    | 0.209             |
| Standard Error <sup>a</sup> | 0.0716            |
| 95% Confidence Interval     | 0.0689 to 0.350   |
| z statistic                 | 2.923             |



|                             |                  |
|-----------------------------|------------------|
| Significance level          | P = 0.0035       |
| <b>RGPS ~ GRACE</b>         |                  |
| Difference between areas    | 0.0270           |
| Standard Error <sup>a</sup> | 0.0558           |
| 95% Confidence Interval     | -0.0823 to 0.136 |
| z statistic                 | 0.485            |
| Significance level          | P = 0.6279       |
| <b>PLRS ~ GRACE</b>         |                  |
| Difference between areas    | 0.182            |
| Standard Error <sup>a</sup> | 0.0823           |
| 95% Confidence Interval     | 0.0208 to 0.344  |
| z statistic                 | 2.213            |
| Significance level          | P = 0.0269       |

(2) Pairwise comparison of multivariate ROC curves in PCI group.

| Variable       | AUC   | SE <sup>a</sup> | 95% CI <sup>b</sup> |
|----------------|-------|-----------------|---------------------|
| GPS_GRACE      | 0.760 | 0.0747          | 0.677 to 0.830      |
| GPS_PLRS       | 0.763 | 0.0597          | 0.681 to 0.833      |
| GRACE_PLRS     | 0.718 | 0.0721          | 0.633 to 0.793      |
| GPS_GRACE_PLRS | 0.776 | 0.0699          | 0.695 to 0.844      |

|                               |                   |
|-------------------------------|-------------------|
| <b>GPS_GRACE ~ GPS_PLRS</b>   |                   |
| Difference between areas      | 0.00360           |
| Standard Error <sup>a</sup>   | 0.0383            |
| 95% Confidence Interval       | -0.0715 to 0.0787 |
| z statistic                   | 0.0941            |
| Significance level            | P = 0.9251        |
| <b>GPS_GRACE ~ GRACE_PLRS</b> |                   |
| Difference between areas      | 0.0417            |
| Standard Error <sup>a</sup>   | 0.0482            |
| 95% Confidence Interval       | -0.0529 to 0.136  |
| z statistic                   | 0.864             |
| Significance level            | P = 0.3878        |

| GPS_GRACE ~ GPS_GRACE_PLRS  |                   |
|-----------------------------|-------------------|
| Difference between areas    | 0.0167            |
| Standard Error <sup>a</sup> | 0.0158            |
| 95% Confidence Interval     | -0.0143 to 0.0476 |
| z statistic                 | 1.055             |
| Significance level          | P = 0.2916        |
| GPS_PLRS ~ GRACE_PLRS       |                   |
| Difference between areas    | 0.0453            |
| Standard Error <sup>a</sup> | 0.0627            |
| 95% Confidence Interval     | -0.0777 to 0.168  |
| z statistic                 | 0.721             |
| Significance level          | P = 0.4706        |
| GPS_PLRS ~ GPS_GRACE_PLRS   |                   |
| Difference between areas    | 0.0131            |
| Standard Error <sup>a</sup> | 0.0316            |
| 95% Confidence Interval     | -0.0488 to 0.0749 |
| z statistic                 | 0.414             |
| Significance level          | P = 0.6789        |
| GRACE_PLRS ~ GPS_GRACE_PLRS |                   |
| Difference between areas    | 0.0583            |
| Standard Error <sup>a</sup> | 0.0420            |
| 95% Confidence Interval     | -0.0240 to 0.141  |
| z statistic                 | 1.388             |
| Significance level          | P = 0.1651        |

(3) Comparisons between multivariate ROC curves with high scores and univariate ROC curves in PCI group  
Pairwise comparison of univariate receiver operating characteristic (ROC) curves in PCI group.

| Variable       | AUC   | SE <sup>a</sup> | 95% CI <sup>b</sup> |
|----------------|-------|-----------------|---------------------|
| GPS_GRACE_PLRS | 0.776 | 0.0699          | 0.695 to 0.844      |
| GPS            | 0.738 | 0.0636          | 0.654 to 0.811      |
| RGPS           | 0.731 | 0.0621          | 0.647 to 0.805      |
| GRACE          | 0.704 | 0.0741          | 0.618 to 0.781      |

| GPS_GRACE_PLRS ~ GPS |
|----------------------|
|----------------------|

|                               |                   |
|-------------------------------|-------------------|
| Difference between areas      | 0.0383            |
| Standard Error <sup>a</sup>   | 0.0299            |
| 95% Confidence Interval       | -0.0204 to 0.0969 |
| z statistic                   | 1.279             |
| Significance level            | P = 0.2007        |
| <b>GPS_GRACE_PLRS ~ RGPS</b>  |                   |
| Difference between areas      | 0.0450            |
| Standard Error <sup>a</sup>   | 0.0313            |
| 95% Confidence Interval       | -0.0163 to 0.106  |
| z statistic                   | 1.440             |
| Significance level            | P = 0.1499        |
| <b>GPS_GRACE_PLRS ~ GRACE</b> |                   |
| Difference between areas      | 0.0721            |
| Standard Error <sup>a</sup>   | 0.0382            |
| 95% Confidence Interval       | -0.00281 to 0.147 |
| z statistic                   | 1.887             |
| Significance level            | P = 0.0592        |

(4) Pairwise comparison of univariate ROC curves in non-PCI group.

| Variable | AUC   | SE <sup>a</sup> | 95% CI <sup>b</sup> |
|----------|-------|-----------------|---------------------|
| GPS      | 0.808 | 0.0619          | 0.662 to 0.911      |
| RGPS     | 0.788 | 0.0644          | 0.638 to 0.896      |
| PLRS     | 0.642 | 0.0752          | 0.483 to 0.780      |
| GRACE    | 0.828 | 0.0614          | 0.684 to 0.925      |

|                             |                    |
|-----------------------------|--------------------|
| <b>GPS ~ RGPS</b>           |                    |
| Difference between areas    | 0.0208             |
| Standard Error <sup>a</sup> | 0.0157             |
| 95% Confidence Interval     | -0.00987 to 0.0515 |
| z statistic                 | 1.330              |
| Significance level          | P = 0.1835         |
| <b>GPS ~ PLRS</b>           |                    |
| Difference between areas    | 0.167              |

|                             |                   |
|-----------------------------|-------------------|
| Standard Error <sup>a</sup> | 0.0886            |
| 95% Confidence Interval     | -0.00699 to 0.340 |
| z statistic                 | 1.881             |
| Significance level          | P = 0.0600        |
| <b>GPS ~ GRACE</b>          |                   |
| Difference between areas    | 0.0198            |
| Standard Error <sup>a</sup> | 0.0781            |
| 95% Confidence Interval     | -0.133 to 0.173   |
| z statistic                 | 0.253             |
| Significance level          | P = 0.8001        |
| <b>RGPS ~ PLRS</b>          |                   |
| Difference between areas    | 0.146             |
| Standard Error <sup>a</sup> | 0.0898            |
| 95% Confidence Interval     | -0.0302 to 0.322  |
| z statistic                 | 1.624             |
| Significance level          | P = 0.1044        |
| <b>RGPS ~ GRACE</b>         |                   |
| Difference between areas    | 0.0406            |
| Standard Error <sup>a</sup> | 0.0753            |
| 95% Confidence Interval     | -0.107 to 0.188   |
| z statistic                 | 0.540             |
| Significance level          | P = 0.5894        |
| <b>PLRS ~ GRACE</b>         |                   |
| Difference between areas    | 0.186             |
| Standard Error <sup>a</sup> | 0.0961            |
| 95% Confidence Interval     | -0.00187 to 0.375 |
| z statistic                 | 1.940             |
| Significance level          | P = 0.0523        |

(5) Pairwise comparison of multivariate ROC curves in non-PCI group.

| Variable   | AUC   | SE <sup>a</sup> | 95% CI <sup>b</sup> |
|------------|-------|-----------------|---------------------|
| GPS_GRACE  | 0.856 | 0.0560          | 0.718 to 0.944      |
| GPS_PLRS   | 0.826 | 0.0687          | 0.682 to 0.924      |
| GRACE_PLRS | 0.834 | 0.0603          | 0.692 to 0.929      |

|                |       |        |                |
|----------------|-------|--------|----------------|
| GPS_GRACE_PLRS | 0.862 | 0.0576 | 0.725 to 0.948 |
|----------------|-------|--------|----------------|

| GPS_GRACE ~ GPS_PLRS        |                   |
|-----------------------------|-------------------|
| Difference between areas    | 0.0302            |
| Standard Error <sup>a</sup> | 0.0411            |
| 95% Confidence Interval     | -0.0504 to 0.111  |
| z statistic                 | 0.735             |
| Significance level          | P = 0.4625        |
| GPS_GRACE ~ GRACE_PLRS      |                   |
| Difference between areas    | 0.0219            |
| Standard Error <sup>a</sup> | 0.0444            |
| 95% Confidence Interval     | -0.0651 to 0.109  |
| z statistic                 | 0.493             |
| Significance level          | P = 0.6221        |
| GPS_GRACE ~ GPS_GRACE_PLRS  |                   |
| Difference between areas    | 0.00625           |
| Standard Error <sup>a</sup> | 0.0213            |
| 95% Confidence Interval     | -0.0356 to 0.0481 |
| z statistic                 | 0.293             |
| Significance level          | P = 0.7696        |
| GPS_PLRS ~ GRACE_PLRS       |                   |
| Difference between areas    | 0.00833           |
| Standard Error <sup>a</sup> | 0.0591            |
| 95% Confidence Interval     | -0.108 to 0.124   |
| z statistic                 | 0.141             |
| Significance level          | P = 0.8879        |
| GPS_PLRS ~ GPS_GRACE_PLRS   |                   |
| Difference between areas    | 0.0365            |
| Standard Error <sup>a</sup> | 0.0293            |
| 95% Confidence Interval     | -0.0211 to 0.0940 |
| z statistic                 | 1.243             |
| Significance level          | P = 0.2140        |
| GRACE_PLRS ~ GPS_GRACE_PLRS |                   |
| Difference between areas    | 0.0281            |

|                             |                  |
|-----------------------------|------------------|
| Standard Error <sup>a</sup> | 0.0376           |
| 95% Confidence Interval     | -0.0456 to 0.102 |
| z statistic                 | 0.747            |
| Significance level          | P = 0.4548       |

(6) Comparisons between multivariate ROC curves with high scores and univariate ROC curves in non-PCI group.

| Variable       | AUC   | SE <sup>a</sup> | 95% CI <sup>b</sup> |
|----------------|-------|-----------------|---------------------|
| GPS_GRACE_PLRS | 0.862 | 0.0576          | 0.725 to 0.948      |
| GPS            | 0.808 | 0.0619          | 0.662 to 0.911      |
| RGPS           | 0.788 | 0.0644          | 0.638 to 0.896      |
| GRACE          | 0.828 | 0.0614          | 0.684 to 0.925      |

| GPS_GRACE_PLRS ~ GPS        |                  |
|-----------------------------|------------------|
| Difference between areas    | 0.0542           |
| Standard Error <sup>a</sup> | 0.0362           |
| 95% Confidence Interval     | -0.0167 to 0.125 |
| z statistic                 | 1.498            |
| Significance level          | P = 0.1342       |
| GPS_GRACE_PLRS ~ RGPS       |                  |
| Difference between areas    | 0.0750           |
| Standard Error <sup>a</sup> | 0.0370           |
| 95% Confidence Interval     | 0.00239 to 0.148 |
| z statistic                 | 2.024            |
| Significance level          | P = 0.0429       |
| GPS_GRACE_PLRS ~ GRACE      |                  |
| Difference between areas    | 0.0344           |
| Standard Error <sup>a</sup> | 0.0589           |
| 95% Confidence Interval     | -0.0810 to 0.150 |
| z statistic                 | 0.584            |
| Significance level          | P = 0.5594       |

**Supplementary Figure 4. Subgroup results based on whether the patients had an acute infection or not.**

(1) Univariate receiver operating characteristic (ROC) curve analysis in acute infection group.

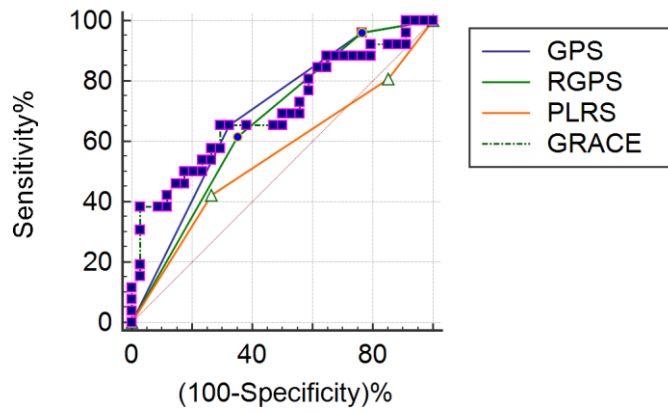

(2) Multivariate ROC curve analysis in acute infection group.

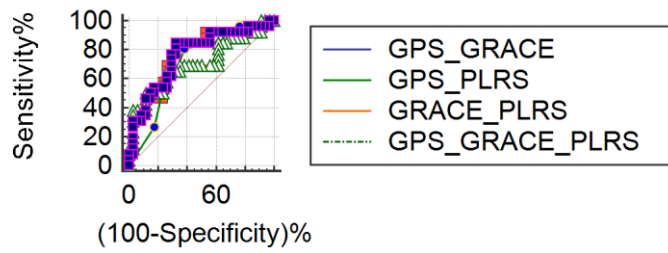

(3) Univariate ROC curve analysis in non-acute infection group.

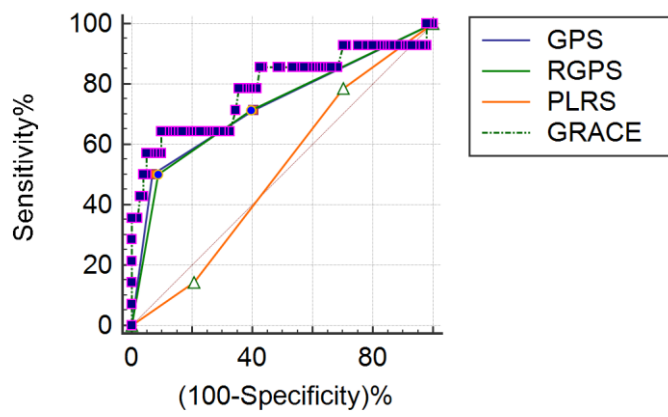

(4) Multivariate ROC curve analysis in non-acute infection group.

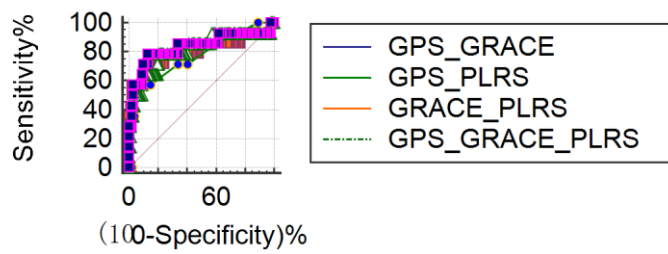



**Supplementary Table 7. Subgroup results based on whether the patients had an acute infection or not.**

(1) Pairwise comparison of univariate receiver operating characteristic (ROC) curves in acute infection group.

| Variable | AUC   | SE <sup>a</sup> | 95% CI <sup>b</sup> |
|----------|-------|-----------------|---------------------|
| GPS      | 0.693 | 0.0619          | 0.560 to 0.806      |
| RGPS     | 0.664 | 0.0636          | 0.530 to 0.781      |
| PLRS     | 0.551 | 0.0720          | 0.417 to 0.680      |
| GRACE    | 0.700 | 0.0707          | 0.568 to 0.812      |

| GPS ~ RGPS                  |                   |
|-----------------------------|-------------------|
| Difference between areas    | 0.0288            |
| Standard Error <sup>a</sup> | 0.0245            |
| 95% Confidence Interval     | -0.0192 to 0.0769 |
| z statistic                 | 1.177             |
| Significance level          | P = 0.2394        |
| GPS ~ PLRS                  |                   |
| Difference between areas    | 0.142             |
| Standard Error <sup>a</sup> | 0.0901            |
| 95% Confidence Interval     | -0.0347 to 0.319  |
| z statistic                 | 1.575             |
| Significance level          | P = 0.1153        |
| GPS ~ GRACE                 |                   |
| Difference between areas    | 0.00735           |
| Standard Error <sup>a</sup> | 0.0793            |
| 95% Confidence Interval     | -0.148 to 0.163   |
| z statistic                 | 0.0927            |
| Significance level          | P = 0.9261        |
| RGPS ~ PLRS                 |                   |
| Difference between areas    | 0.113             |
| Standard Error <sup>a</sup> | 0.0909            |
| 95% Confidence Interval     | -0.0650 to 0.291  |
| z statistic                 | 1.245             |

|                             |                  |
|-----------------------------|------------------|
| Significance level          | P = 0.2133       |
| <b>RGPS ~ GRACE</b>         |                  |
| Difference between areas    | 0.0362           |
| Standard Error <sup>a</sup> | 0.0776           |
| 95% Confidence Interval     | -0.116 to 0.188  |
| z statistic                 | 0.467            |
| Significance level          | P = 0.6408       |
| <b>PLRS ~ GRACE</b>         |                  |
| Difference between areas    | 0.149            |
| Standard Error <sup>a</sup> | 0.0915           |
| 95% Confidence Interval     | -0.0300 to 0.329 |
| z statistic                 | 1.632            |
| Significance level          | P = 0.1027       |

(2) Pairwise comparison of multivariate ROC curves in acute infection group.

| Variable       | AUC   | SE <sup>a</sup> | 95% CI <sup>b</sup> |
|----------------|-------|-----------------|---------------------|
| GPS_GRACE      | 0.762 | 0.0641          | 0.635 to 0.863      |
| GPS_PLRS       | 0.701 | 0.0683          | 0.569 to 0.813      |
| GRACE_PLRS     | 0.705 | 0.0711          | 0.573 to 0.816      |
| GPS_GRACE_PLRS | 0.761 | 0.0643          | 0.634 to 0.862      |

|                               |                  |
|-------------------------------|------------------|
| <b>GPS_GRACE ~ GPS_PLRS</b>   |                  |
| Difference between areas      | 0.0611           |
| Standard Error <sup>a</sup>   | 0.0398           |
| 95% Confidence Interval       | -0.0170 to 0.139 |
| z statistic                   | 1.533            |
| Significance level            | P = 0.1252       |
| <b>GPS_GRACE ~ GRACE_PLRS</b> |                  |
| Difference between areas      | 0.0577           |
| Standard Error <sup>a</sup>   | 0.0511           |
| 95% Confidence Interval       | -0.0425 to 0.158 |
| z statistic                   | 1.129            |
| Significance level            | P = 0.2589       |

| GPS_GRACE ~ GPS_GRACE_PLRS  |                   |
|-----------------------------|-------------------|
| Difference between areas    | 0.00113           |
| Standard Error <sup>a</sup> | 0.00699           |
| 95% Confidence Interval     | -0.0126 to 0.0148 |
| z statistic                 | 0.162             |
| Significance level          | P = 0.8715        |
| GPS_PLRS ~ GRACE_PLRS       |                   |
| Difference between areas    | 0.00339           |
| Standard Error <sup>a</sup> | 0.0764            |
| 95% Confidence Interval     | -0.146 to 0.153   |
| z statistic                 | 0.0444            |
| Significance level          | P = 0.9646        |
| GPS_PLRS ~ GPS_GRACE_PLRS   |                   |
| Difference between areas    | 0.0600            |
| Standard Error <sup>a</sup> | 0.0377            |
| 95% Confidence Interval     | -0.0139 to 0.134  |
| z statistic                 | 1.590             |
| Significance level          | P = 0.1118        |
| GRACE_PLRS ~ GPS_GRACE_PLRS |                   |
| Difference between areas    | 0.0566            |
| Standard Error <sup>a</sup> | 0.0498            |
| 95% Confidence Interval     | -0.0410 to 0.154  |
| z statistic                 | 1.136             |
| Significance level          | P = 0.2559        |

(3) Comparisons between multivariate ROC curves with high scores and univariate ROC curves in acute infection group.

| Variable       | AUC   | SE <sup>a</sup> | 95% CI <sup>b</sup> |
|----------------|-------|-----------------|---------------------|
| GPS_GRACE_PLRS | 0.761 | 0.0643          | 0.634 to 0.862      |
| GPS_GRACE      | 0.762 | 0.0641          | 0.635 to 0.863      |
| GPS            | 0.693 | 0.0619          | 0.560 to 0.806      |
| RGPS           | 0.664 | 0.0636          | 0.530 to 0.781      |
| GRACE          | 0.700 | 0.0707          | 0.568 to 0.812      |

| GPS_GRACE_PLRS ~ GPS        |                   |
|-----------------------------|-------------------|
| Difference between areas    | 0.0684            |
| Standard Error <sup>a</sup> | 0.0378            |
| 95% Confidence Interval     | -0.00562 to 0.143 |
| z statistic                 | 1.811             |
| Significance level          | P = 0.0701        |
| GPS_GRACE_PLRS ~ RGPS       |                   |
| Difference between areas    | 0.0973            |
| Standard Error <sup>a</sup> | 0.0413            |
| 95% Confidence Interval     | 0.0164 to 0.178   |
| z statistic                 | 2.357             |
| Significance level          | P = 0.0184        |
| GPS_GRACE_PLRS ~ GRACE      |                   |
| Difference between areas    | 0.0611            |
| Standard Error <sup>a</sup> | 0.0496            |
| 95% Confidence Interval     | -0.0362 to 0.158  |
| z statistic                 | 1.231             |
| Significance level          | P = 0.2183        |
| GPS_GRACE ~ GPS             |                   |
| Difference between areas    | 0.0696            |
| Standard Error <sup>a</sup> | 0.0367            |
| 95% Confidence Interval     | -0.00242 to 0.142 |
| z statistic                 | 1.894             |
| Significance level          | P = 0.0582        |
| GPS_GRACE ~ RGPS            |                   |
| Difference between areas    | 0.0984            |
| Standard Error <sup>a</sup> | 0.0407            |
| 95% Confidence Interval     | 0.0186 to 0.178   |
| z statistic                 | 2.418             |
| Significance level          | P = 0.0156        |
| GPS_GRACE ~ GRACE           |                   |
| Difference between areas    | 0.0622            |
| Standard Error <sup>a</sup> | 0.0501            |
| 95% Confidence Interval     | -0.0360 to 0.160  |

|                    |            |
|--------------------|------------|
| z statistic        | 1.242      |
| Significance level | P = 0.2143 |

(4) Pairwise comparison of univariate ROC curves in non-acute infection group.

| Variable | AUC   | SE <sup>a</sup> | 95% CI <sup>b</sup> |
|----------|-------|-----------------|---------------------|
| GPS      | 0.731 | 0.0811          | 0.640 to 0.809      |
| RGPS     | 0.726 | 0.0796          | 0.635 to 0.805      |
| PLRS     | 0.510 | 0.0685          | 0.415 to 0.604      |
| GRACE    | 0.786 | 0.0835          | 0.700 to 0.857      |

| GPS ~ RGPS                  |                   |
|-----------------------------|-------------------|
| Difference between areas    | 0.00460           |
| Standard Error <sup>a</sup> | 0.00983           |
| 95% Confidence Interval     | -0.0147 to 0.0239 |
| z statistic                 | 0.467             |
| Significance level          | P = 0.6402        |
| GPS ~ PLRS                  |                   |
| Difference between areas    | 0.221             |
| Standard Error <sup>a</sup> | 0.0755            |
| 95% Confidence Interval     | 0.0730 to 0.369   |
| z statistic                 | 2.927             |
| Significance level          | P = 0.0034        |
| GPS ~ GRACE                 |                   |
| Difference between areas    | 0.0552            |
| Standard Error <sup>a</sup> | 0.0750            |
| 95% Confidence Interval     | -0.0919 to 0.202  |
| z statistic                 | 0.735             |
| Significance level          | P = 0.4621        |
| RGPS ~ PLRS                 |                   |
| Difference between areas    | 0.216             |
| Standard Error <sup>a</sup> | 0.0742            |
| 95% Confidence Interval     | 0.0709 to 0.362   |
| z statistic                 | 2.915             |

|                             |                  |
|-----------------------------|------------------|
| Significance level          | P = 0.0036       |
| <b>RGPS ~ GRACE</b>         |                  |
| Difference between areas    | 0.0598           |
| Standard Error <sup>a</sup> | 0.0743           |
| 95% Confidence Interval     | -0.0859 to 0.205 |
| z statistic                 | 0.804            |
| Significance level          | P = 0.4213       |
| <b>PLRS ~ GRACE</b>         |                  |
| Difference between areas    | 0.276            |
| Standard Error <sup>a</sup> | 0.0823           |
| 95% Confidence Interval     | 0.115 to 0.438   |
| z statistic                 | 3.355            |
| Significance level          | P = 0.0008       |

(5) Pairwise comparison of multivariate ROC curves in non-acute infection group.

| Variable       | AUC   | SE <sup>a</sup> | 95% CI <sup>b</sup> |
|----------------|-------|-----------------|---------------------|
| GPS_GRACE      | 0.802 | 0.0871          | 0.717 to 0.870      |
| GPS_PLRS       | 0.760 | 0.0756          | 0.672 to 0.835      |
| GRACE_PLRS     | 0.811 | 0.0778          | 0.728 to 0.878      |
| GPS_GRACE_PLRS | 0.832 | 0.0788          | 0.751 to 0.895      |

|                               |                   |
|-------------------------------|-------------------|
| <b>GPS_GRACE ~ GPS_PLRS</b>   |                   |
| Difference between areas      | 0.0414            |
| Standard Error <sup>a</sup>   | 0.0630            |
| 95% Confidence Interval       | -0.0822 to 0.165  |
| z statistic                   | 0.656             |
| Significance level            | P = 0.5117        |
| <b>GPS_GRACE ~ GRACE_PLRS</b> |                   |
| Difference between areas      | 0.00955           |
| Standard Error <sup>a</sup>   | 0.0381            |
| 95% Confidence Interval       | -0.0652 to 0.0843 |
| z statistic                   | 0.250             |
| Significance level            | P = 0.8023        |

| GPS_GRACE ~ GPS_GRACE_PLRS  |                    |
|-----------------------------|--------------------|
| Difference between areas    | 0.0304             |
| Standard Error <sup>a</sup> | 0.0190             |
| 95% Confidence Interval     | -0.00676 to 0.0676 |
| z statistic                 | 1.603              |
| Significance level          | P = 0.1088         |
| GPS_PLRS ~ GRACE_PLRS       |                    |
| Difference between areas    | 0.0509             |
| Standard Error <sup>a</sup> | 0.0757             |
| 95% Confidence Interval     | -0.0975 to 0.199   |
| z statistic                 | 0.672              |
| Significance level          | P = 0.5014         |
| GPS_PLRS ~ GPS_GRACE_PLRS   |                    |
| Difference between areas    | 0.0718             |
| Standard Error <sup>a</sup> | 0.0574             |
| 95% Confidence Interval     | -0.0407 to 0.184   |
| z statistic                 | 1.251              |
| Significance level          | P = 0.2110         |
| GRACE_PLRS ~ GPS_GRACE_PLRS |                    |
| Difference between areas    | 0.0209             |
| Standard Error <sup>a</sup> | 0.0298             |
| 95% Confidence Interval     | -0.0375 to 0.0793  |
| z statistic                 | 0.700              |
| Significance level          | P = 0.4837         |

(6) Comparisons between multivariate ROC curves with high scores and univariate ROC curves in non-acute infection group.

| Variable       | AUC   | SE <sup>a</sup> | 95% CI <sup>b</sup> |
|----------------|-------|-----------------|---------------------|
| GPS_GRACE_PLRS | 0.832 | 0.0788          | 0.751 to 0.895      |
| GPS            | 0.731 | 0.0811          | 0.640 to 0.809      |
| RGPS           | 0.726 | 0.0796          | 0.635 to 0.805      |
| GRACE          | 0.786 | 0.0835          | 0.700 to 0.857      |

| GPS_GRACE_PLRS ~ GPS        |                   |
|-----------------------------|-------------------|
| Difference between areas    | 0.101             |
| Standard Error <sup>a</sup> | 0.0569            |
| 95% Confidence Interval     | -0.0104 to 0.213  |
| z statistic                 | 1.777             |
| Significance level          | P = 0.0756        |
| GPS_GRACE_PLRS ~ RGPS       |                   |
| Difference between areas    | 0.106             |
| Standard Error <sup>a</sup> | 0.0566            |
| 95% Confidence Interval     | -0.00525 to 0.217 |
| z statistic                 | 1.867             |
| Significance level          | P = 0.0619        |
| GPS_GRACE_PLRS ~ GRACE      |                   |
| Difference between areas    | 0.0460            |
| Standard Error <sup>a</sup> | 0.0314            |
| 95% Confidence Interval     | -0.0155 to 0.107  |
| z statistic                 | 1.466             |
| Significance level          | P = 0.1426        |



**Supplementary Figure 5. Receiver operating characteristic of three PLRSs.**

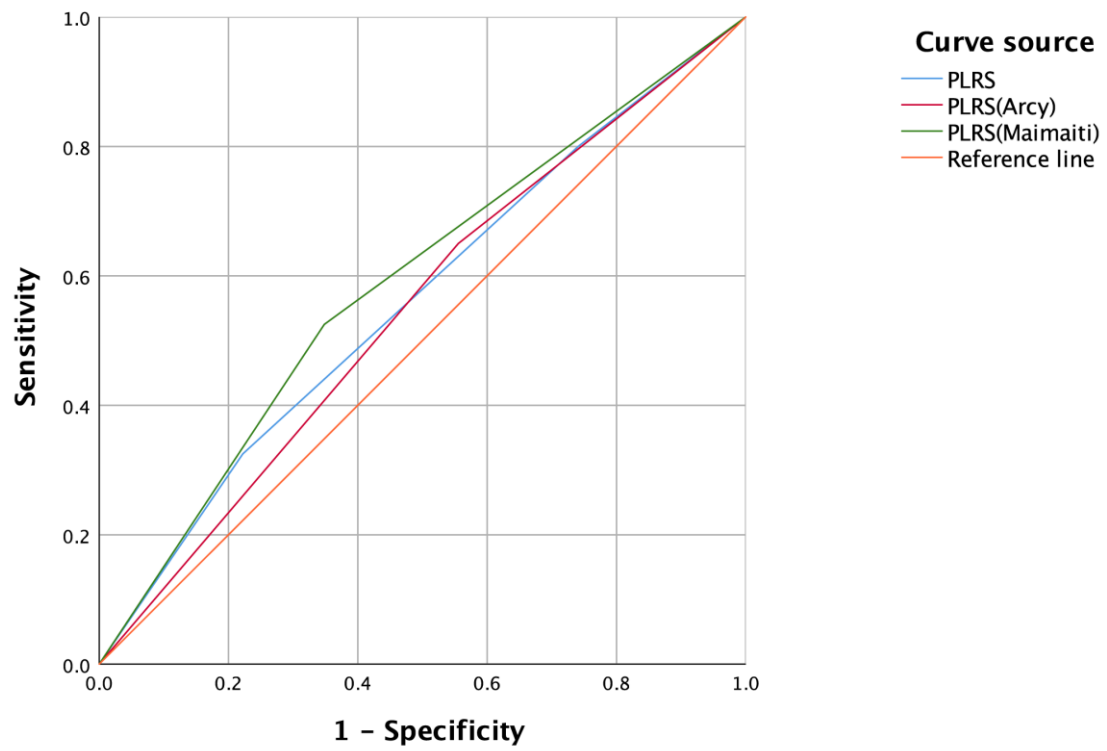

**Supplementary Table 8. Receiver operating characteristic of three PLRSs.**

| Vairable                    | AUC   | CI          | P     |
|-----------------------------|-------|-------------|-------|
| PLRS                        | 0.561 | 0.458-0.664 | 0.241 |
| <sup>a</sup> PLRS(Arcy)     | 0.547 | 0.447-0.648 | 0.365 |
| <sup>b</sup> PLRS(Maimaiti) | 0.588 | 0.487-0.690 | 0.090 |

AUC = area under the curve; CI = confidence interval; PLRS = platelet-to-lymphocyte ratio score;

<sup>a</sup>PLRS(Arcy) is defined as high PLRS (>137) and low PLRS (<137) from studies by Ayca et al.

<sup>b</sup>PLRS(Maimaiti) is defined as high PLRS (>165.33) and low PLRS (<165.33) from studies by Maimaiti et al.
